# Supplementary material for: Pharmacogenomics and chemical library screens reveal a novel SCFSKP2 inhibitor that overcomes Bortezomib resistance in multiple myeloma
Source: PubMed Central journal article supplement — Leukemia. 2016 Nov 4;31(3):645–53. doi: 10.1038/leu.2016.258 (PMC5339431; doi:10.1038/leu.2016.258), 2016-11-04
Supplement: leu2016258x6.pdf [file leu2016258x6.pdf]

**DT204 Treatment Promotes Cell Cycle Arrest**

A.

| Relative %       | Sub G0-G1 (Apoptotic cells) | G0-G1 | S    | G2-M |
|------------------|-----------------------------|-------|------|------|
| Control          | 7.1                         | 38.6  | 17.5 | 36.3 |
| DT204 5 $\mu$ M  | 4.6                         | 41.5  | 14.7 | 38.9 |
| DT204 10 $\mu$ M | 5.3                         | 43.6  | 15.5 | 35.3 |
| DT204 25 $\mu$ M | 3.3                         | 43.2  | 14.5 | 38.7 |
| DT204 50 $\mu$ M | 1.1                         | 47.6  | 12.2 | 38.9 |

B.

**SKP2 Knockout Effect on Cell Cycle**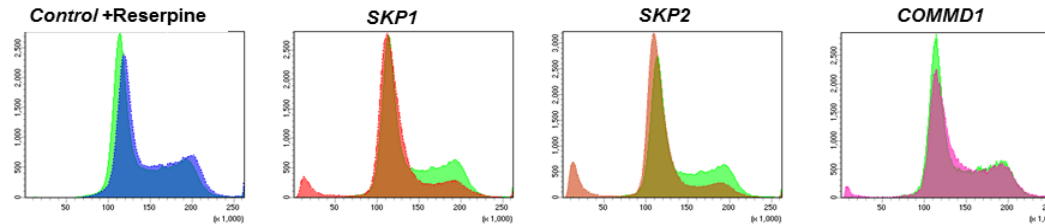

| shRNA<br>Phase                    | Control | Control<br>+Reserpine | SKP1 | SKP2 | COMMD1 |
|-----------------------------------|---------|-----------------------|------|------|--------|
| Sub G0-G1<br>(Apoptotic<br>cells) | 0.5     | 0.2                   | 6.7  | 10.9 | 2.6    |
| G0-G1                             | 60.8    | 53.1                  | 72.8 | 71.4 | 57.7   |
| S                                 | 15.9    | 17.8                  | 8.8  | 7.6  | 16.7   |
| G2-M                              | 20.7    | 26                    | 10.2 | 8.9  | 20.3   |
