# Supplementary figures and images for: Pharmacogenomics and chemical library screens reveal a novel SCFSKP2 inhibitor that overcomes Bortezomib resistance in multiple myeloma
Source: PubMed Central journal article supplement — Leukemia. 2016 Nov 4;31(3):645–53. doi: 10.1038/leu.2016.258 (PMC5339431; doi:10.1038/leu.2016.258), 2016-11-04

Supplementary Figure 1

BTZ-NR (N=83)

BTZ-R (N=86)

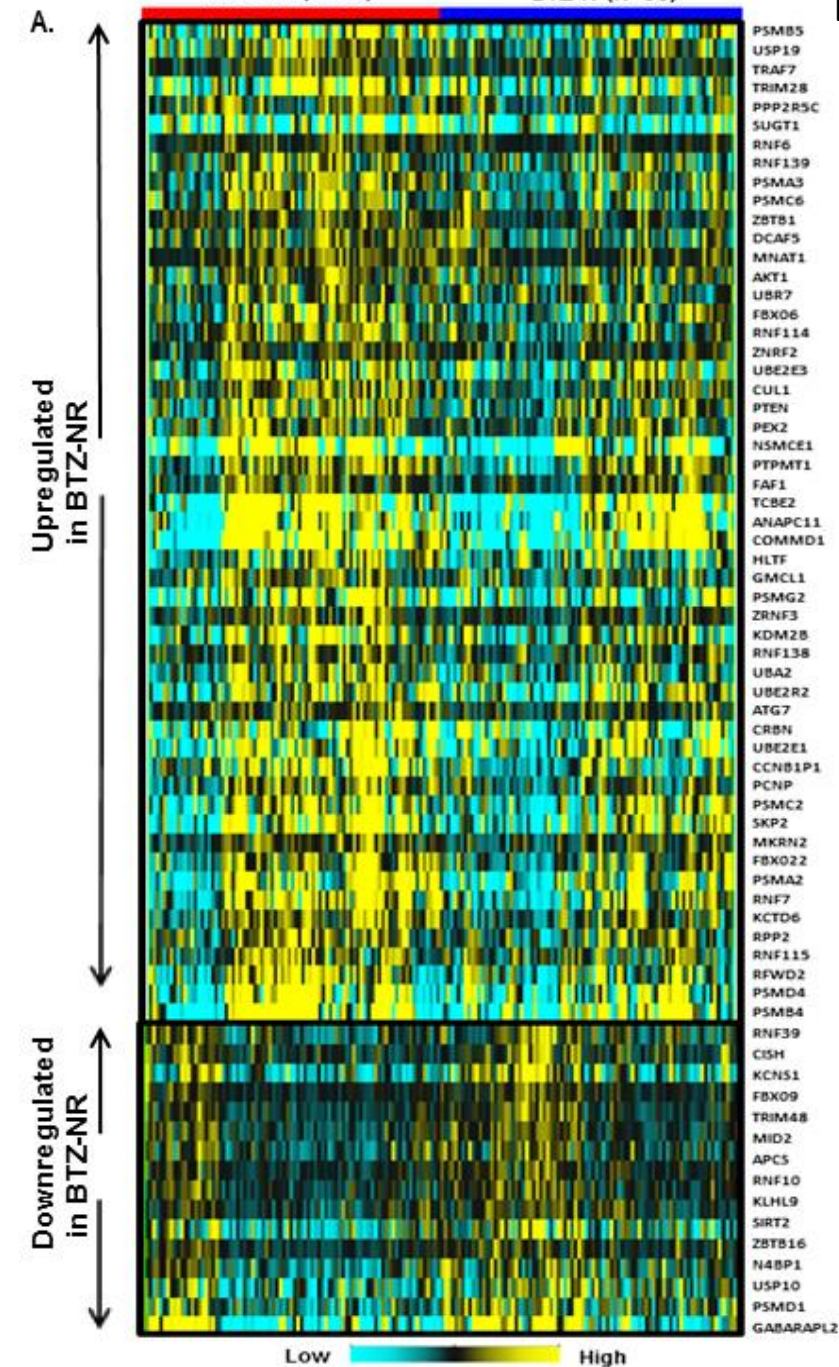

**B.**

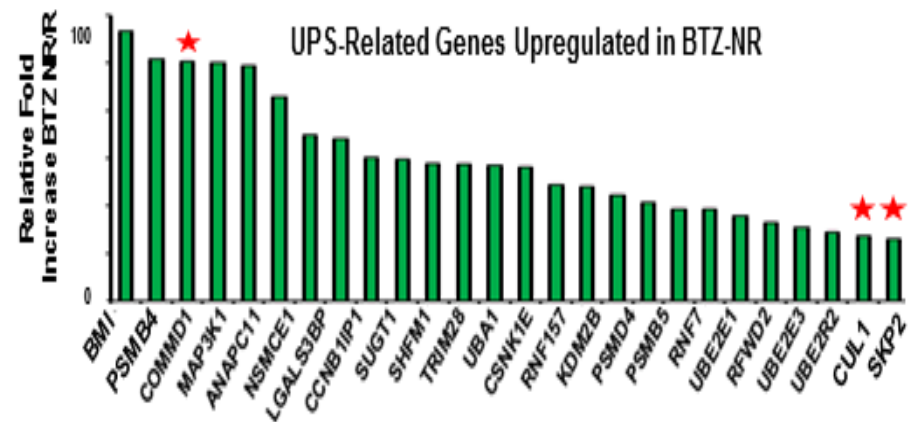

**C.**

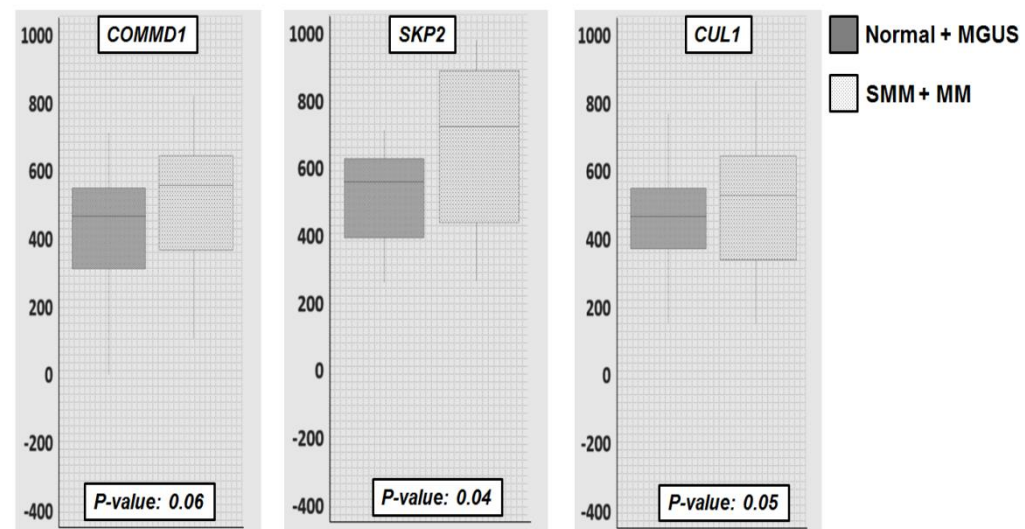

Supplement: leu2016258x2.pdf [file leu2016258x2.pdf]

A.

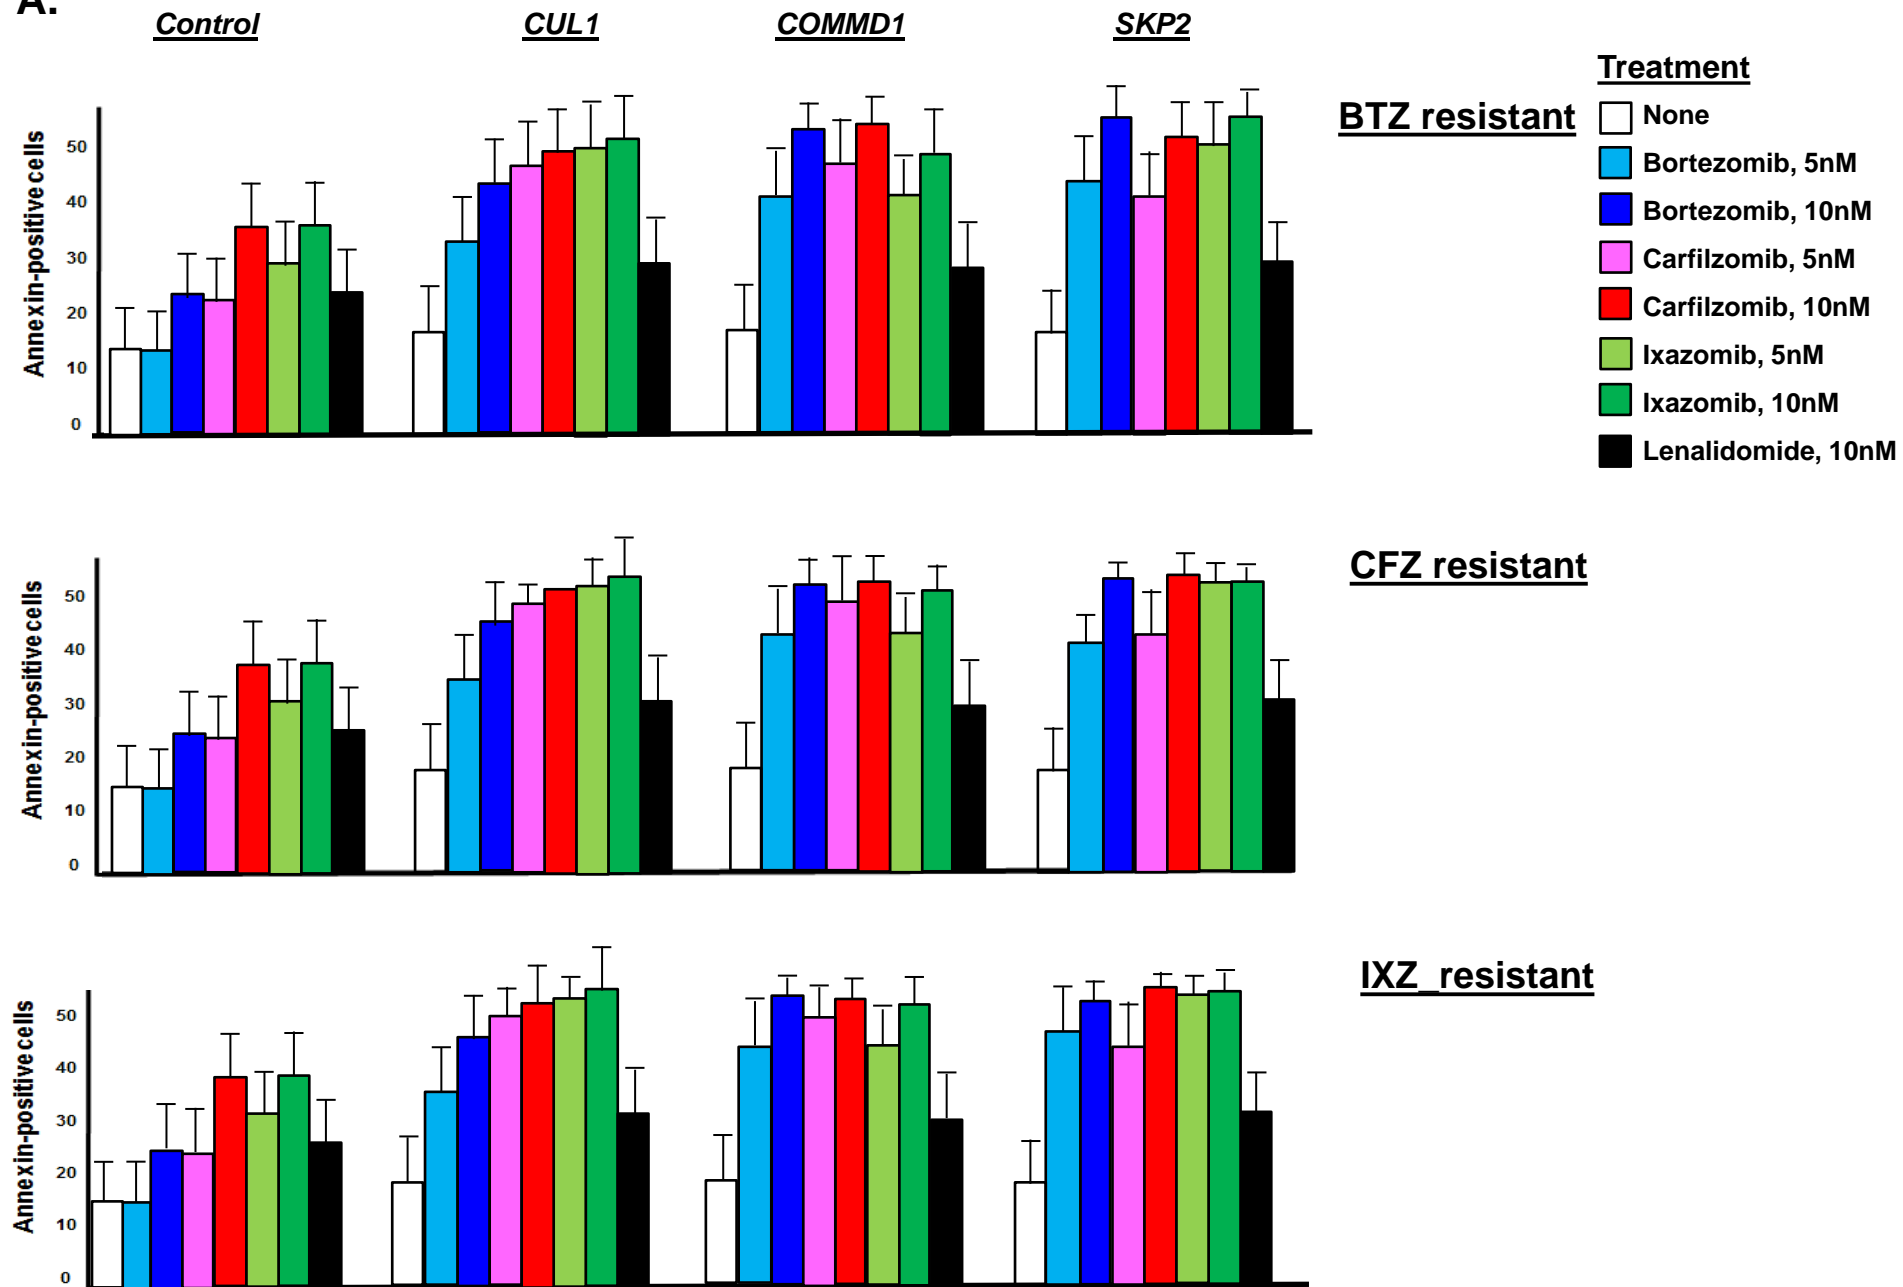

Supplement: leu2016258x4.pdf [file leu2016258x4.pdf]

**Supplementary Figure 4**

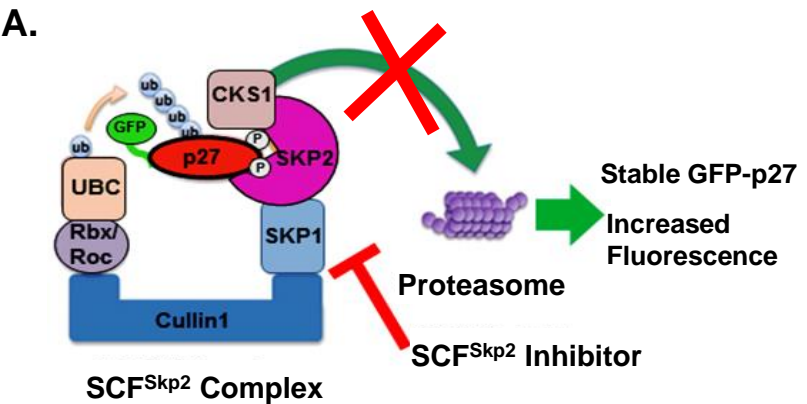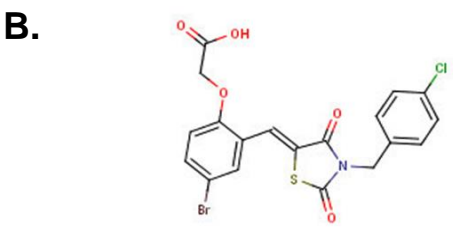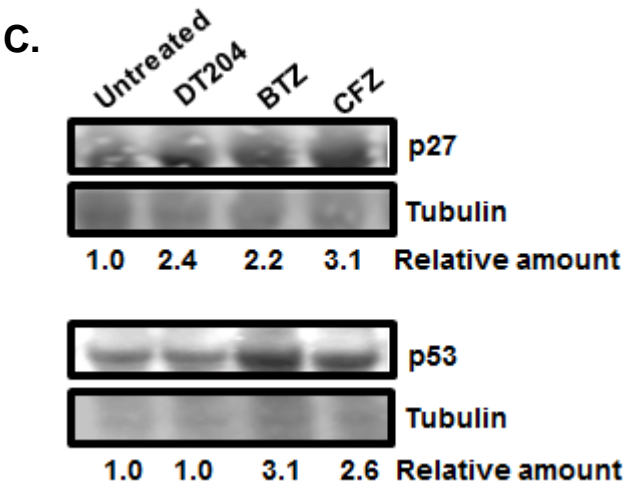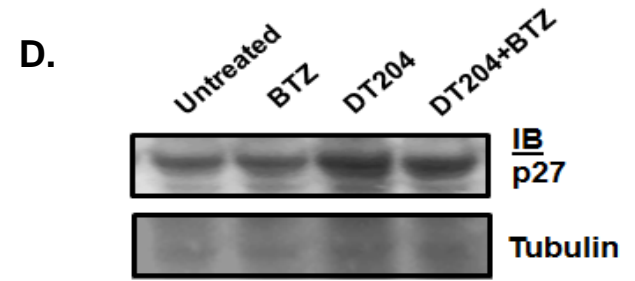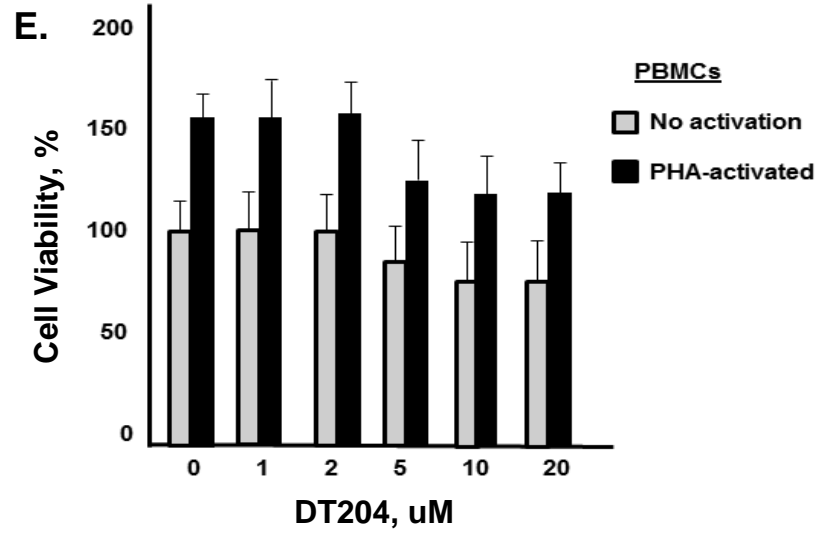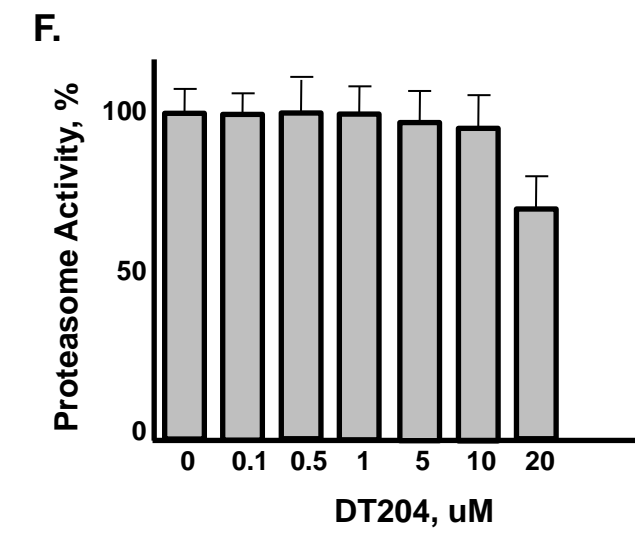

Supplement: leu2016258x5.pdf [file leu2016258x5.pdf]

Supplementary Figure 6

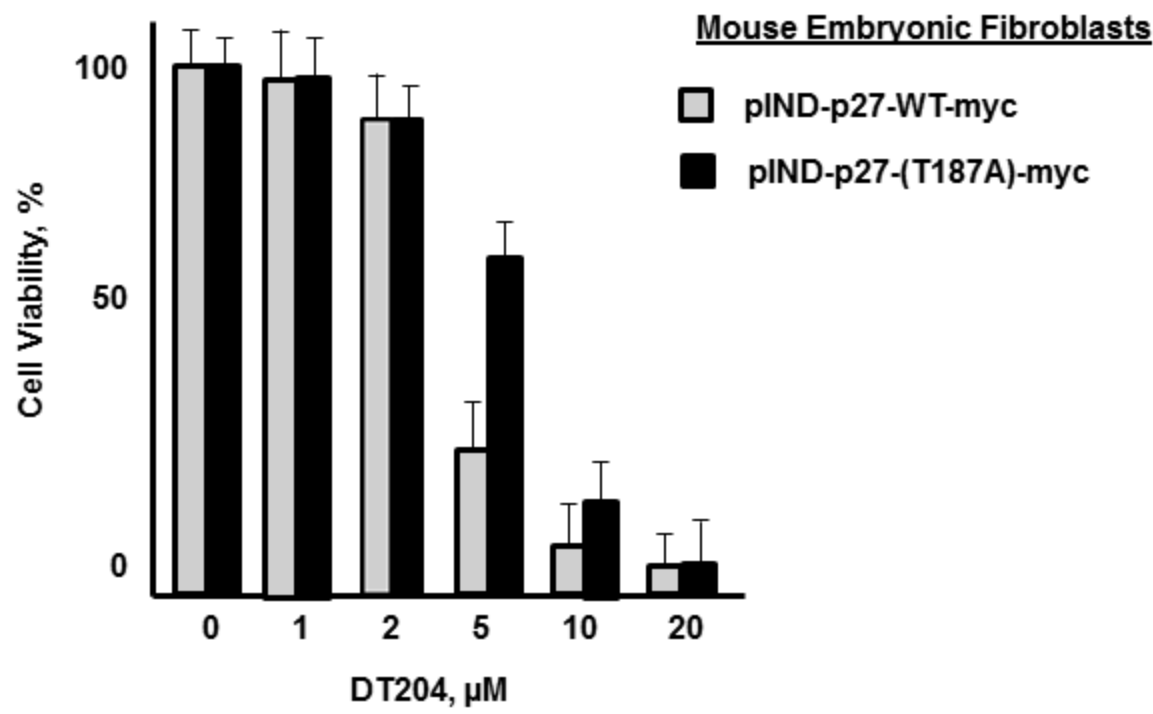

Supplement: leu2016258x7.pdf [file leu2016258x7.pdf]
